# Supplementary material for: Mussel-inspired PDA@PEDOT nanocomposite hydrogel with excellent mechanical strength, self-adhesive, and self-healing properties for a flexible strain sensor
Source: Royal Society of Chemistry journal article supplement (doi:10.1039/d3tb02748a), 2024-01-01
Supplement: d3tb02748a1.pdf [file d3tb02748a1.pdf]

## Mussel-inspired PDA@PEDOT nanocomposite hydrogel with excellent mechanical strength, self-adhesive, and self-healing properties for flexible strain sensor

Xiaoyi Li,<sup>a,b,1</sup> Xueshan Zhao,<sup>c,1</sup> Ruiqi liu,<sup>c</sup> Hui Wang,<sup>d</sup> Shuang Wang,<sup>a,b</sup> Bing Fan,<sup>e</sup> Chenggong Hu,<sup>a,b\*</sup> Haibo Wang<sup>a,b</sup>

<sup>a</sup> Department of Critical Care Medicine, West China Hospital, Sichuan University, Chengdu, 610065, China

<sup>b</sup> College of Biomass Science and Engineering, Sichuan University, Chengdu, 610065, China.

<sup>c</sup> Department of Cardiovascular surgery, West China Hospital, Sichuan University, Chengdu, 610065, China.

<sup>d</sup> West China School of Basic Medical Sciences and Forensic Medicine, Sichuan University, Chengdu 610041, PR China.

<sup>e</sup> Qingdao Research Institute of Sichuan University, Qingdao 266200, PR China.

\* **Corresponding authors:** huchenggong@scu.edu.cn(C. Hu)

<sup>1</sup> The authors contributed equally to this work.

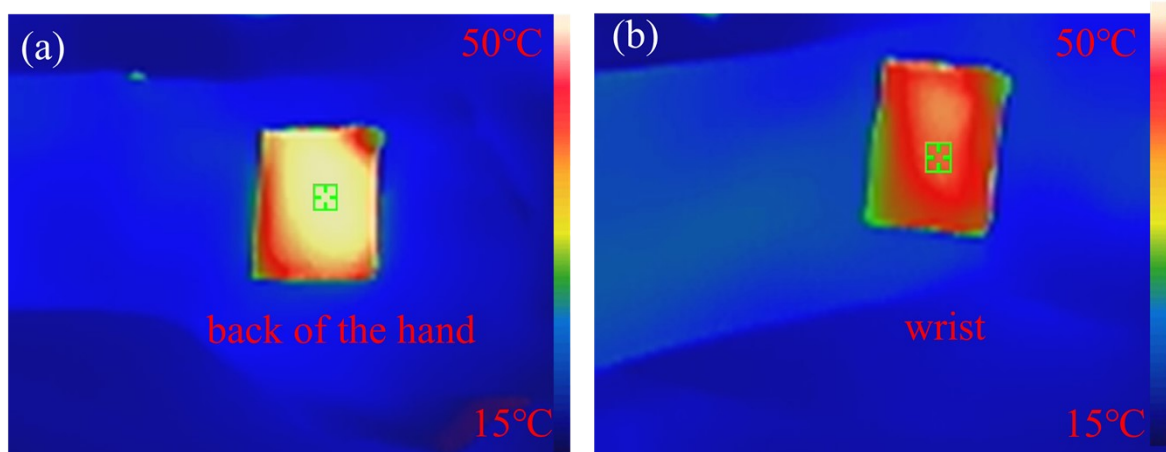

Fig. S1. Infrared thermography during thermotherapy. (a) Back of hand and (b) wrist.

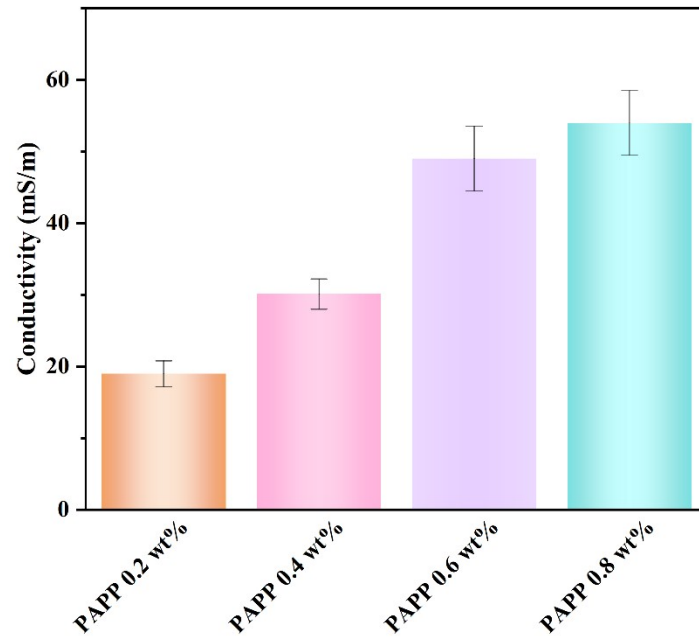

Fig. S2. Conductivity of hydrogels with different PDA@PEDOT content

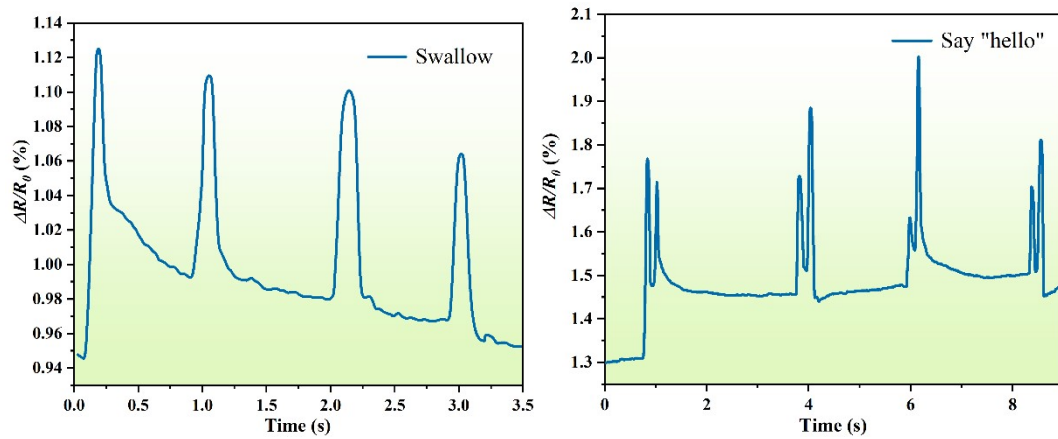

Fig. S3. The PAPP sensors for mechanotransduction signal applications: swallow and speaking.

Table S1. Performance summary of representative hydrogels.

| Materials                                            | Sensitivity | Response Time (ms) | Mechanical strength (KPa) | Elongation at break (%) | Self-healing Rate (%) | Reference |
|------------------------------------------------------|-------------|--------------------|---------------------------|-------------------------|-----------------------|-----------|
| PAA/PANI hydrogels                                   | 12.63       | 222                | 120                       | 2830                    | /                     | 1         |
| PNIPAM/CMCS/M                                        |             |                    |                           |                         |                       |           |
| WCNT/PANI hydrogels                                  | 3.6         | /                  | 47                        | 225                     | /                     | 2         |
| PSA/LiCl/PANI hydrogels                              | 1.74        | 223                | 470                       | 600                     | /                     | 3         |
| PEDOT:PSS-PVA hydrogels                              | 3.18        | /                  | 186                       | 270                     | 83.5                  | 4         |
| PL ( PEDOT:LS ) -                                    |             |                    |                           |                         |                       |           |
| Fe <sup>3+</sup> -PAA/PVA hydrogels                  | 1.64        | 253                | 98.2                      | 460                     | /                     | 5         |
| CNC-                                                 |             |                    |                           |                         |                       |           |
| PEDOT : PSS/PVA hydrogels                            | 7.97        | /                  | 989.6                     | 989.6                   | 92.57                 | 6         |
| CMC/PTh/AHC hydrogels                                | /           | /                  | 758                       | 107.4                   | 93.37                 | 7         |
| SDS/PPy/LMPAm hydrogel                               | /           | 300                | 345                       | 1021                    | /                     | 8         |
| PVA-EGaIn-x@PAAm/PAA@FeCl <sub>3</sub> @PPy hydrogel | 0.28        | /                  | 344.7                     | 700                     | /                     | 9         |
| PVA@MXene@PPy hydrogel                               | 1           | 100                | 26.78                     | 4351                    | 100                   | 10        |
| PAM/PDA@PEDOT hydrogel                               | 2.82        | 140                | 187                       | 3383                    | 95                    | This work |

## Notes and references

- 1.D. Liu, H. Zhou, Y. Zhao, C. Huyan, Z. Wang, H. Torun, Z. Guo, S. Dai, B. B. Xu and F. Chen, *Small*, 2022, **18**, e2203258.
- 2.T. Zhan, H. Xie, J. Mao, S. Wang, Y. Hu and Z. Guo, *ChemistrySelect*, 2021, **6**, 4229-4237.
- 3.Z. Zhang and P. Raffa, *European Polymer Journal*, 2023, **199**.
- 4.J. Cao, Z. Zhang, K. Li, C. Ma, W. Zhou, T. Lin, J. Xu and X. Liu, *Nanomaterials (Basel)*, 2023, **13**.
- 5.X. Su, S. Zhai, K. Jin, C. Li, A. Chen, Z. Cai, C. Xian and Y. Zhao, *ACS Appl Mater Interfaces*, 2023, **15**, 45526-45535.
- 6.X. Chai, J. Tang, Y. Li, Y. Cao, X. Chen, T. Chen and Z. Zhang, *ACS Appl Mater Interfaces*, 2023, **15**, 18262-18271.

- 7.N. Danmatam, J. T. H. Pearce and D. Pattavarakorn, *Journal of Applied Polymer Science*, 2023, **141**.
- 8.X. Cao, Q. Cao, T. Zhang, W. Ji, U. Muhammad, J. Chen and Y. Wei, *Biomacromolecules*, 2024, **25**, 143-154.
- 9.Y. Li, Y. Peng, J.-Y. Tian, S. Duan, Y. Fu, S. Zhang and M. Du, *Colloids and Surfaces A: Physicochemical and Engineering Aspects*, 2023, **670**.
- 10.Z. Qin, G. Zhao, Y. Zhang, Z. Gu, Y. Tang, J. T. Aladejana, J. Ren, Y. Jiang, Z. Guo, X. Peng, X. Zhang, B. B. Xu and T. Chen, *Small*, 2023, **19**, e2303038.
